# Supplementary material for: Adherence to Prudent and Mediterranean Dietary Patterns Is Inversely Associated with Lung Cancer in Moderate But Not Heavy Male Polish Smokers: A Case-Control Study
Source: PubMed Central journal article supplement (PMC7764397; doi:10.3390/nu12123788), 2020-12-10
Supplement: nutrients-12-03788-s001.pdf [file nutrients-12-03788-s001.pdf]

**Table S1.** Food groups used in the dietary pattern analysis.

| <b>Food Groups</b>                                     | <b>Dietary Items</b>                                                                                                                                                                                                                                                                                                                  |
|--------------------------------------------------------|---------------------------------------------------------------------------------------------------------------------------------------------------------------------------------------------------------------------------------------------------------------------------------------------------------------------------------------|
| Whole grain products                                   | Wholemeal wheat or rye bread, seeded loaves, pumpnickel, wholemeal cracker bread, buckwheat groats, barley, brown rice, wholemeal pasta, etc.                                                                                                                                                                                         |
| Fruits                                                 | All kinds of fruits                                                                                                                                                                                                                                                                                                                   |
| Nuts and seeds                                         | Peanuts, hazelnuts, walnuts, cashews, coconuts, chestnuts, peanut butter, chocolate-nut spread, pumpkin seeds, sesame seeds, sunflower seeds, wheat germs, wheat bran, etc.                                                                                                                                                           |
| Vegetables                                             | All kinds of vegetables (potatoes not included)                                                                                                                                                                                                                                                                                       |
| Fish                                                   | Pollock, cod, perch, hake, carp to 1 kg, tuna, panga, trout, salmon, sardines, herring, mackerel, eel, large carp, etc.                                                                                                                                                                                                               |
| Legumes                                                | Corn, green peas, green beans, etc.                                                                                                                                                                                                                                                                                                   |
| Fruit, vegetable, vegetable-fruit juices               | Mixed fruit juice, orange, grapefruit, apple, pear, grape, blackcurrant, cherry juice, mixed vegetable juice, tomato, carrot and carrot-fruit juice, etc.                                                                                                                                                                             |
| Refined grain products                                 | White bread, rye, wheat-rye bread, toast bread, white bread rolls, brioche, bagels, semolina, milled barley, pasta, white rice, rice flakes, etc.                                                                                                                                                                                     |
| Sugar, honey and sweets                                | Sugar added to beverages, such as tea, coffee. Honey added to dishes and beverages. Chocolate, chocolate sweets and chocolate bars, boiled sweets, hard caramels, jellied sweets, fudge, biscuits, cream cakes, fruit cakes, sponge cakes, cheesecakes, doughnuts, poppy-seed cakes, muffins, croissants, ice-creams and custard etc. |
| Red and processed meats                                | Pork, beef, veal, wild boar, venison, quail, mallard, hare, etc.                                                                                                                                                                                                                                                                      |
| White meat                                             | Poultry and rabbit                                                                                                                                                                                                                                                                                                                    |
| Potatoes                                               | Boiled, baked, French fries, potato rosti, gnocchi, etc.                                                                                                                                                                                                                                                                              |
| Other fats                                             | Margarine for baking, frying, spreading. Mayonnaise and salad dressings                                                                                                                                                                                                                                                               |
| Sweetened beverages and energy drinks                  | Sweetened beverages and energy drinks                                                                                                                                                                                                                                                                                                 |
| Animal fats                                            | Lard, pork fat, etc.                                                                                                                                                                                                                                                                                                                  |
| Milk, fermented milk drinks and curd cheese            | Milk and natural milk beverages (yoghurt, kefir, buttermilk), porridge, cheese curd, natural cottage cheese, soft cheese, mozzarella, cottage cheese with herbs, etc.                                                                                                                                                                 |
| Sweetened milk drinks and flavoured homogenized cheese | Fruit yoghurts, yoghurts with chocolate flakes, flavoured buttermilk, hot chocolate, flavoured curds (with fruit, chocolate, vanilla), etc.                                                                                                                                                                                           |
| Eggs                                                   | Scrambled eggs, omelette, egg salad, cooked eggs                                                                                                                                                                                                                                                                                      |
| Cheese                                                 | Hard cheese, blue cheese, processed cheese, cheese spreads, etc.                                                                                                                                                                                                                                                                      |
| Breakfast cereals                                      | Muesli, cornflakes, other cereals - sweetened or unsweetened, etc.                                                                                                                                                                                                                                                                    |
| Vegetable oils                                         | Vegetable-based oil                                                                                                                                                                                                                                                                                                                   |
| Dried fruit, fruit preserves and fruit condiments      | Raisins, dried apricots, figs, apples, prunes, fruit compote, jams, marmalades, dates, dried bananas, etc.                                                                                                                                                                                                                            |
| Alcohol                                                | Beer, wine and cocktails, vodka and other spirits                                                                                                                                                                                                                                                                                     |

**Table S2.** The ‘Polish-aMED’ score (0–9 points) calculation and reference medians of food consumption frequency–data for 262 subjects of the control sample.

| Food Groups                           | Frequency of consumption<br>(times/day)* |                     | Criteria for 1 point          |
|---------------------------------------|------------------------------------------|---------------------|-------------------------------|
|                                       | Mean (95% CI)                            | Median <sup>#</sup> |                               |
| Vegetables                            | 0.831 (0.758; 0.903)                     | 0.704               | Greater than median intake    |
| Fruit                                 | 0.625 (0.583; 0.666)                     | 0.565               | Greater than median intake    |
| Whole grains                          | 0.711 (0.633; 0.789)                     | 0.671               | Greater than median intake    |
| Fish                                  | 0.233 (0.198; 0.268)                     | 0.200               | Greater than median intake    |
| Legumes                               | 0.207 (0.171; 0.244)                     | 0.125               | Greater than median intake    |
| Nuts and seeds                        | 0.258 (0.201; 0.316)                     | 0.050               | Greater than median intake    |
| Ratio of vegetable oils to animal fat | 1.334 (0.824; 1.844)                     | 0.444               | Greater than median intake    |
| Red and processed meat                | 1.998 (1.856; 2.214)                     | 1.913               | Less than median intake       |
| Alcohol                               | -                                        | -                   | Do not abuse <sup>&amp;</sup> |

\* food consumption frequency was expressed as times/day after assigning the values for categories of frequencies as follows: ‘never or almost never’ = 0; ‘once a month or less’ = 0.025; ‘several times a month’ = 0.1; ‘several times a week’ = 0.571; ‘daily’ = 1; ‘several times a day’ = 2. 95% CI—95% confidence interval; <sup>#</sup> reference median of food consumption frequency; <sup>&</sup> the men were asked about their alcohol consumption and, based on the literature, two classifications were created: (i) abuse, (ii) do not abuse alcohol [63, 64, 65].

**Table S3.** Estimation of the overall physical activity after combining data based on self-reported physical activity at work and physical activity in leisure time [69].

|                                      |          | Physical activity at work |          |          |
|--------------------------------------|----------|---------------------------|----------|----------|
|                                      |          | low                       | moderate | high     |
| Physical activity<br>in leisure time | low      | low                       | low      | moderate |
|                                      | moderate | low                       | moderate | moderate |
|                                      | high     | moderate                  | moderate | high     |

**Table S4.** The mean (95% Confidence Interval) of the frequency of food consumption by smoking status\* for cancer-control sample (times/day).

| Food groups                                            | Moderate smoker |                |          | Heavy smoker   |                |          |
|--------------------------------------------------------|-----------------|----------------|----------|----------------|----------------|----------|
|                                                        | Cancer Sample   | Control Sample | <i>p</i> | Cancer Sample  | Control Sample | <i>p</i> |
| Sample size (n)                                        | 112             | 140            | -        | 74             | 58             | -        |
| Sugar, honey and sweets                                | 2.0 (1.9; 2.0)  | 1.9 (1.7; 2.0) | 0.012    | 2.0 (1.9; 2.0) | 2.0 (1.7; 2.0) | 0.910    |
| Red and processed meats                                | 1.9 (1.7; 2.0)  | 2.0 (1.8; 1.9) | 0.130    | 1.6 (1.4; 1.9) | 2.0 (1.7; 2.2) | 0.044    |
| Animal fats                                            | 1.4 (1.2; 1.5)  | 1.1 (1.0; 1.3) | 0.071    | 1.4 (1.2; 1.6) | 1.3 (1.0; 1.5) | 0.447    |
| Refined grain products                                 | 1.3 (1.2; 1.5)  | 1.0 (0.9; 1.1) | 0.001    | 1.3 (1.8; 1.4) | 1.2 (1.0; 1.4) | 0.508    |
| Milk, fermented milk drinks and curd cheese            | 0.9 (0.7; 0.9)  | 1.0 (0.9; 1.1) | 0.113    | 1.0 (0.8; 1.1) | 1.0 (0.8; 1.2) | 0.532    |
| Vegetables                                             | 0.5 (0.4; 0.5)  | 0.6 (0.6; 0.7) | < 0.001  | 0.5 (0.4; 0.6) | 0.5 (0.4; 0.6) | 0.733    |
| Fruits                                                 | 0.6 (0.5; 0.6)  | 0.7 (0.6; 0.8) | 0.024    | 0.6 (0.5; 0.7) | 0.6 (0.5; 0.7) | 0.846    |
| Potatoes                                               | 0.6 (0.6; 0.7)  | 0.6 (0.6; 0.7) | 0.998    | 0.6 (0.6; 0.7) | 0.8 (0.7; 0.9) | 0.009    |
| Whole grain products                                   | 0.4 (0.3; 0.5)  | 0.7 (0.6; 0.8) | < 0.001  | 0.5 (0.4; 0.6) | 0.6 (0.4; 0.7) | 0.378    |
| Vegetable oils (including olive oil)                   | 0.5 (0.4; 0.6)  | 0.5 (0.5; 0.6) | 0.238    | 0.5 (0.4; 0.5) | 0.5 (0.4; 0.6) | 0.414    |
| Other fats (margarine, mayonnaise, dressings)          | 0.4 (0.3; 0.5)  | 0.4 (0.3; 0.5) | 0.657    | 0.4 (0.2; 0.5) | 0.5 (0.3; 0.6) | 0.211    |
| Cheese                                                 | 0.4 (0.3; 0.5)  | 0.4 (0.4; 0.5) | 0.582    | 0.4 (0.3; 0.4) | 0.3 (0.2; 0.4) | 0.566    |
| White meat                                             | 0.4 (0.3; 0.4)  | 0.4 (0.4; 0.5) | 0.068    | 0.3 (0.3; 0.4) | 0.4 (0.4; 0.5) | 0.086    |
| Sweetened beverages and energy drinks                  | 0.4 (0.3; 0.5)  | 0.4 (0.3; 0.5) | 0.838    | 0.4 (0.3; 0.5) | 0.3 (0.2; 0.4) | 0.036    |
| Dried fruit and preserves                              | 0.1 (0.1; 0.1)  | 0.1 (0.1; 0.2) | 0.295    | 0.1 (0.1; 0.1) | 0.1 (0.1; 0.2) | 0.146    |
| Eggs                                                   | 0.3 (0.2; 0.3)  | 0.4 (0.3; 0.4) | 0.022    | 0.3 (0.3; 0.4) | 0.4 (0.3; 0.4) | 0.366    |
| Alcohol                                                | 0.4 (0.3; 0.5)  | 0.4 (0.3; 0.5) | 0.610    | 0.2 (0.1; 0.3) | 0.2 (0.1; 0.4) | 0.981    |
| Sweetened milk drinks and flavoured homogenized cheese | 0.2 (0.1; 0.2)  | 0.1 (0.1; 0.2) | 0.476    | 0.2 (0.1; 0.3) | 0.2 (0.1; 0.2) | 0.168    |
| Fish                                                   | 0.2 (0.1; 0.2)  | 0.2 (0.2; 0.3) | 0.229    | 0.2 (0.1; 0.3) | 0.2 (0.1; 0.3) | 0.915    |
| Nuts and seeds                                         | 0.1 (0.0; 0.1)  | 0.3 (0.2; 0.4) | < 0.001  | 0.1 (0.0; 0.2) | 0.1 (0.1; 0.2) | 0.504    |
| Legumes                                                | 0.1 (0.1; 0.1)  | 0.2 (0.2; 0.3) | 0.002    | 0.2 (0.1; 0.3) | 0.2 (0.1; 0.2) | 0.705    |
| Fruit, vegetable, vegetable-fruit juices               | 0.2 (0.1; 0.2)  | 0.1 (0.1; 0.2) | 0.290    | 0.1 (0.1; 0.2) | 0.1 (0.0; 0.2) | 0.396    |
| Breakfast cereals                                      | 0.0 (0.0; 0.1)  | 0.1 (0.0; 0.1) | 0.287    | 0.0 (0.0; 0.1) | 0.0 (0.0; 0.1) | 0.545    |

\* Data for never smokers were not presented due to the small number of subjects (n = 55) especially within the cancer sample (n = 1); *p* – level of significance verified with a Kruskal-Wallis test.

**Table S5.** The mean (95% Confidence Interval) of the frequency of food consumption by dietary patterns (times/day).

| Food groups                                            | Total         | Adherence to the dietary pattern |               |               |                           |               |               |               |               |               |                      |               |               |
|--------------------------------------------------------|---------------|----------------------------------|---------------|---------------|---------------------------|---------------|---------------|---------------|---------------|---------------|----------------------|---------------|---------------|
|                                                        |               | 'Prudent'                        |               |               | 'Westernized Traditional' |               |               | 'Sweet Dairy' |               |               | 'Polish-a MED' score |               |               |
|                                                        |               | lower                            | moderate      | higher        | lower                     | moderate      | higher        | lower         | moderate      | higher        | low                  | moderate      | high          |
| Sample size (n)                                        | 439           | 146                              | 146           | 147           | 147                       | 146           | 146           | 146           | 147           | 146           | 177                  | 221           | 41            |
| Sugar, honey and sweets                                | 2.0 (1.9;2.2) | 3.0 (2.8;3.1)                    | 2.0 (1.8;2.1) | 1.2 (1.0;1.4) | 1.2 (1.1;1.4)             | 2.0 (1.8;2.1) | 2.9 (2.7;3.1) | 1.3 (1.1;1.4) | 2.0 (1.7;2.1) | 2.9 (2.7;3.1) | 2.4 (1.1;1.4)        | 2.0 (1.2;1.4) | 1.0 (0.8;1.3) |
| Red and processed meats                                | 1.9 (1.8;2.0) | 1.9 (1.8;2.1)                    | 1.9 (1.7;2.1) | 2.0 (1.8;2.2) | 1.1 (1.0;1.2)             | 1.9 (1.7;2.0) | 2.9 (2.7;3.1) | 1.6 (1.4;1.7) | 1.9 (1.7;2.1) | 2.4 (2.2;2.6) | 1.8 (1.0;1.2)        | 2.1 (1.1;1.3) | 2.1 (0.9;1.5) |
| Animal fats                                            | 1.3 (1.2;1.3) | 1.4 (1.2;1.5)                    | 1.3 (1.1;1.4) | 1.2 (1.0;1.2) | 1.1 (1.0;1.2)             | 1.2 (1.1;1.3) | 1.5 (1.4;1.7) | 0.6 (0.5;0.6) | 1.2 (1.1;1.3) | 2.0 (1.9;2.1) | 1.3 (0.8;1.0)        | 1.3 (0.8;1.0) | 0.8 (0.5;0.8) |
| Refined grain products                                 | 1.1 (1.0;1.2) | 1.8 (1.7;1.8)                    | 1.1 (1.0;1.2) | 0.5 (0.5;0.6) | 0.7 (0.6;0.8)             | 1.1 (1.0;1.2) | 1.6 (1.5;1.7) | 0.8 (0.7;0.9) | 1.0 (0.9;1.1) | 1.6 (1.5;1.7) | 1.3 (0.7;0.9)        | 1.1 (0.7;0.8) | 0.7 (0.5;0.7) |
| Milk, fermented milk drinks and curd cheese            | 0.9 (0.9;1.0) | 0.9 (0.7;1.0)                    | 0.9 (0.8;1.0) | 1.1 (1.0;1.2) | 0.8 (0.7;0.9)             | 0.9 (0.8;1.0) | 1.1 (1.0;1.2) | 0.6 (0.5;0.6) | 1.0 (0.9;1.1) | 1.2 (1.1;1.4) | 0.8 (0.6;0.7)        | 1.0 (0.6;0.7) | 1.0 (0.5;0.8) |
| Vegetables                                             | 0.8 (0.8;0.9) | 0.8 (0.7;0.9)                    | 0.8 (0.7;0.8) | 0.9 (0.8;1.0) | 0.7 (0.6;0.7)             | 0.8 (0.7;0.9) | 1.0 (0.9;1.1) | 0.7 (0.6;0.7) | 0.8 (0.7;0.9) | 1.0 (0.9;1.1) | 0.7 (0.4;0.5)        | 0.9 (0.4;0.5) | 1.0 (0.3;0.5) |
| Fruits                                                 | 0.8 (0.7;0.8) | 0.6 (0.6;0.7)                    | 0.7 (0.7;0.8) | 0.9 (0.8;1.0) | 0.6 (0.6;0.7)             | 0.7 (0.6;0.8) | 0.9 (0.9;1.0) | 0.6 (0.5;0.7) | 0.8 (0.7;0.8) | 0.9 (0.9;1.0) | 0.5 (0.4;0.5)        | 0.9 (0.4;0.5) | 1.2 (0.4;0.6) |
| Potatoes                                               | 0.7 (0.6;0.7) | 0.7 (0.7;0.7)                    | 0.7 (0.6;0.7) | 0.6 (0.5;0.7) | 0.5 (0.4;0.6)             | 0.7 (0.7;0.8) | 0.8 (0.7;0.8) | 0.6 (0.5;0.6) | 0.7 (0.6;0.7) | 0.7 (0.7;0.8) | 0.7 (0.3;0.4)        | 0.7 (0.3;0.4) | 0.6 (0.2;0.4) |
| Whole grain products                                   | 0.6 (0.5;0.6) | 0.2 (0.1;0.2)                    | 0.5 (0.4;0.5) | 1.2 (1.1;1.2) | 0.7 (0.6;0.8)             | 0.6 (0.5;0.7) | 0.5 (0.4;0.6) | 0.6 (0.5;0.7) | 0.7 (0.6;0.7) | 0.5 (0.4;0.6) | 0.3 (0.4;0.5)        | 0.7 (0.6;0.7) | 1.2 (0.4;0.7) |
| Vegetable oils (including olive oil)                   | 0.5 (0.5;0.5) | 0.5 (0.4;0.5)                    | 0.5 (0.4;0.5) | 0.6 (0.5;0.6) | 0.4 (0.3;0.5)             | 0.5 (0.5;0.6) | 0.5 (0.5;0.6) | 0.4 (0.3;0.4) | 0.5 (0.5;0.6) | 0.6 (0.6;0.7) | 0.4 (0.3;0.4)        | 0.5 (0.3;0.4) | 0.6 (0.3;0.4) |
| Other fats (margarine, mayonnaise, dressings)          | 0.4 (0.3;0.4) | 0.5 (0.4;0.6)                    | 0.4 (0.3;0.5) | 0.2 (0.2;0.3) | 0.2 (0.1;0.2)             | 0.4 (0.3;0.5) | 0.6 (0.4;0.7) | 0.6 (0.5;0.7) | 0.4 (0.3;0.5) | 0.2 (0.1;0.3) | 0.4 (0.6;0.7)        | 0.4 (0.5;0.6) | 0.4 (0.5;0.7) |
| Cheese                                                 | 0.4 (0.4;0.4) | 0.3 (0.3;0.4)                    | 0.4 (0.3;0.5) | 0.4 (0.4;0.5) | 0.3 (0.3;0.4)             | 0.4 (0.3;0.4) | 0.5 (0.4;0.5) | 0.2 (0.2;0.3) | 0.4 (0.4;0.5) | 0.5 (0.5;0.6) | 0.3 (0.3;0.3)        | 0.4 (0.2;0.3) | 0.4 (0.3;0.4) |
| White meat                                             | 0.4 (0.4;0.4) | 0.3 (0.3;0.4)                    | 0.4 (0.4;0.4) | 0.4 (0.4;0.5) | 0.3 (0.2;0.3)             | 0.4 (0.4;0.4) | 0.5 (0.5;0.5) | 0.3 (0.3;0.3) | 0.4 (0.4;0.5) | 0.4 (0.4;0.5) | 0.3 (0.4;0.3)        | 0.4 (0.2;0.3) | 0.5 (0.2;0.3) |
| Sweetened beverages and energy drinks                  | 0.4 (0.3;0.4) | 0.4 (0.3;0.4)                    | 0.4 (0.3;0.5) | 0.4 (0.3;0.5) | 0.2 (0.2;0.3)             | 0.3 (0.3;0.4) | 0.6 (0.5;0.7) | 0.3 (0.2;0.3) | 0.3 (0.3;0.4) | 0.6 (0.5;0.6) | 0.3 (0.4;0.5)        | 0.4 (0.4;0.5) | 0.4 (0.4;0.7) |
| Dried fruit and preserves                              | 0.3 (0.4;0.4) | 0.2 (0.3;0.4)                    | 0.3 (0.3;0.4) | 0.3 (0.4;0.5) | 0.3 (0.4;0.5)             | 0.3 (0.3;0.4) | 0.3 (0.3;0.4) | 0.2 (0.3;0.4) | 0.3 (0.4;0.5) | 0.3 (0.4;0.4) | 0.2 (0.3;0.4)        | 0.3 (0.3;0.4) | 0.4 (0.4;0.6) |
| Eggs                                                   | 0.3 (0.3;0.3) | 0.3 (0.2;0.3)                    | 0.3 (0.3;0.3) | 0.4 (0.3;0.4) | 0.2 (0.2;0.3)             | 0.3 (0.3;0.4) | 0.4 (0.3;0.4) | 0.2 (0.2;0.3) | 0.3 (0.3;0.4) | 0.4 (0.4;0.5) | 0.2 (0.2;0.2)        | 0.3 (0.3;0.3) | 0.4 (0.2;0.3) |
| Alcohol                                                | 0.3 (0.3;0.4) | 0.4 (0.3;0.5)                    | 0.2 (0.2;0.3) | 0.4 (0.3;0.5) | 0.2 (0.2;0.2)             | 0.4 (0.3;0.5) | 0.4 (0.3;0.5) | 0.3 (0.2;0.4) | 0.4 (0.3;0.4) | 0.3 (0.3;0.4) | 0.4 (0.3;0.4)        | 0.3 (0.3;0.4) | 0.3 (0.1;0.4) |
| Sweetened milk drinks and flavoured homogenized cheese | 0.2 (0.1;0.2) | 0.2 (0.1;0.2)                    | 0.1 (0.1;0.2) | 0.2 (0.1;0.2) | 0.1 (0.1;0.1)             | 0.2 (0.1;0.2) | 0.2 (0.2;0.3) | 0.1 (0.0;0.1) | 0.2 (0.1;0.2) | 0.3 (0.2;0.3) | 0.1 (0.2;0.3)        | 0.2 (0.3;0.4) | 0.1 (0.2;0.3) |
| Fish                                                   | 0.2 (0.2;0.2) | 0.1 (0.1;0.2)                    | 0.2 (0.2;0.2) | 0.3 (0.3;0.4) | 0.2 (0.1;0.2)             | 0.2 (0.2;0.3) | 0.3 (0.2;0.3) | 0.2 (0.1;0.2) | 0.2 (0.2;0.3) | 0.2 (0.2;0.3) | 0.1 (0.1;0.1)        | 0.2 (0.2;0.3) | 0.5 (0.4;0.6) |
| Nuts and seeds                                         | 0.2 (0.1;0.2) | 0.1 (0.1;0.1)                    | 0.1 (0.1;0.1) | 0.4 (0.3;0.5) | 0.2 (0.1;0.2)             | 0.2 (0.1;0.2) | 0.2 (0.1;0.3) | 0.2 (0.1;0.2) | 0.2 (0.1;0.2) | 0.3 (0.2;0.3) | 0.1 (0.2;0.2)        | 0.2 (0.4;0.5) | 0.6 (0.5;0.8) |
| Legumes                                                | 0.2 (0.1;0.2) | 0.1 (0.1;0.2)                    | 0.1 (0.1;0.2) | 0.3 (0.2;0.3) | 0.2 (0.1;0.2)             | 0.2 (0.1;0.2) | 0.2 (0.2;0.3) | 0.1 (0.1;0.2) | 0.2 (0.1;0.2) | 0.2 (0.2;0.3) | 0.1 (0.1;0.2)        | 0.2 (0.2;0.3) | 0.4 (0.3;0.5) |
| Fruit, vegetable, vegetable-fruit juices               | 0.1 (0.1;0.2) | 0.1 (0.1;0.1)                    | 0.1 (0.1;0.2) | 0.2 (0.1;0.2) | 0.1 (0.1;0.1)             | 0.1 (0.1;0.2) | 0.2 (0.1;0.2) | 0.1 (0.1;0.1) | 0.1 (0.1;0.2) | 0.2 (0.1;0.2) | 0.1 (0.2;0.2)        | 0.1 (0.2;0.3) | 0.3 (0.3;0.4) |
| Breakfast cereals                                      | 0.0 (0.0;0.1) | 0.0 (0.0;0.0)                    | 0.0 (0.0;0.0) | 0.7 (0.0;0.1) | 0.1 (0.0;0.1)             | 0.0 (0.0;0.0) | 0.0 (0.0;0.1) | 0.0 (0.0;0.0) | 0.0 (0.0;0.1) | 0.1 (0.0;0.1) | 0.0 (0.1;0.1)        | 0.0 (0.1;0.2) | 0.1 (0.2;0.2) |

**Table S6.** Characteristics of the lung cancer sub-sample and the control sub-sample after age matching.

| Variable            | Cancer-control sample |       | Cancer sample |       | Control sub-sample |       | <i>p</i> |
|---------------------|-----------------------|-------|---------------|-------|--------------------|-------|----------|
|                     | n                     | %     | n             | %     | n                  | %     |          |
| <i>Sample size</i>  | 406                   | 100.0 | 168           | 100.0 | 238                | 100.0 |          |
| <i>Age (years*)</i> | 62.3 (6.4)            |       | 63.4 (6.7)    |       | 61.6 (6.2)         |       | 0.5580   |
| 45.0-49.9           | 7                     | 1.7   | 3             | 1.8   | 4                  | 1.7   |          |
| 50.0-54.9           | 37                    | 9.1   | 12            | 7.1   | 25                 | 10.5  |          |
| 55.0-59.9           | 72                    | 17.8  | 24            | 14.3  | 48                 | 20.2  |          |
| 60.0-64.9           | 132                   | 32.5  | 51            | 30.3  | 81                 | 34.0  | 0.0590   |
| 65.0-69.9           | 97                    | 23.9  | 42            | 25.0  | 55                 | 23.1  |          |
| 70.0-74.9           | 47                    | 11.6  | 29            | 17.3  | 18                 | 7.6   |          |
| 75.0-80.0           | 14                    | 3.4   | 7             | 4.2   | 7                  | 2.9   |          |

\*mean and standard deviation (SD); n—number; %—percentage of the sample; *p*—level of significance assessed by chi<sup>2</sup> test

**Table S7.** Odds ratios (95% Confidence Interval) of lung cancer risk by adherence to the dietary patterns in ever smokers after age matching of controls.

| Adherence to the dietary pattern | Cancer-control sample (n=406) |          |                   |          | Moderate smoker (n=168) |          |                   |          | Heavy smoker (n=238) |          |                   |          |
|----------------------------------|-------------------------------|----------|-------------------|----------|-------------------------|----------|-------------------|----------|----------------------|----------|-------------------|----------|
|                                  | Crude model                   | <i>p</i> | Adjusted model    | <i>p</i> | Crude model             | <i>p</i> | Adjusted model    | <i>p</i> | Crude model          | <i>p</i> | Adjusted model    | <i>p</i> |
| <b>'Prudent'</b>                 |                               |          |                   |          |                         |          |                   |          |                      |          |                   |          |
| lower (ref.)                     | Ref.                          |          | Ref.              |          | Ref.                    |          | Ref.              |          | Ref.                 |          | Ref.              |          |
| moderate                         | 0.61 (0.37; 0.99)             | 0.0438   | 0.71 (0.41; 1.21) | 0.2044   | 0.60 (0.33; 1.12)       | 0.1064   | 0.73 (0.37; 1.45) | 0.3732   | 0.84 (0.34; 2.07)    | 0.7004   | 0.80 (0.88; 2.24) | 0.6662   |
| higher                           | 0.54 (0.42; 0.70)             | <0.0001  | 0.74 (0.55; 0.99) | 0.0411   | 0.46 (0.33; 0.66)       | <0.0001  | 0.64 (0.42; 0.96) | 0.0313   | 0.62 (0.89; 0.57)    | 0.6244   | 1.04 (0.60; 1.80) | 0.8823   |
| <b>'Westernized Traditional'</b> |                               |          |                   |          |                         |          |                   |          |                      |          |                   |          |
| lower (ref.)                     | Ref.                          |          | Ref.              |          | Ref.                    |          | Ref.              |          | Ref.                 |          | Ref.              |          |
| moderate                         | 1.06 (0.66; 1.72)             | 0.0518   | 0.82 (0.47; 1.41) | 0.4648   | 1.15 (0.61; 2.19)       | 0.6649   | 0.84 (0.40; 1.77) | 0.6485   | 0.92 (0.37; 2.29)    | 0.8570   | 0.91 (0.33; 2.52) | 0.8581   |
| higher                           | 0.98 (0.77; 1.26)             | 0.9034   | 0.83 (0.62; 1.11) | 0.1999   | 1.07 (0.78; 1.47)       | 0.6625   | 0.94 (0.63; 1.39) | 0.7514   | 0.81 (0.51; 1.28)    | 0.3571   | 0.75 (0.44; 1.28) | 0.2899   |
| <b>'Sweet Dairy'</b>             |                               |          |                   |          |                         |          |                   |          |                      |          |                   |          |
| lower (ref.)                     | Ref.                          |          | Ref.              |          | Ref.                    |          | Ref.              |          | Ref.                 |          | Ref.              |          |
| moderate                         | 0.85 (0.52; 1.39)             | 0.5161   | 0.79 (0.46; 1.36) | 0.3966   | 0.88 (0.47; 1.66)       | 0.7031   | 0.87 (0.43; 1.76) | 0.6876   | 0.77 (0.30; 2.01)    | 0.5903   | 0.66 (0.22; 1.98) | 0.4504   |
| higher                           | 1.09 (0.86; 1.39)             | 0.4631   | 1.02 (0.78; 1.34) | 0.8444   | 1.12 (0.82; 1.55)       | 0.4641   | 0.98 (0.68; 1.43) | 0.9317   | 1.02 (0.66; 1.58)    | 0.0056   | 1.06 (0.65; 1.73) | 0.8068   |
| <b>'Polish-aMED' score</b>       |                               |          |                   |          |                         |          |                   |          |                      |          |                   |          |
| low (0-3 points; ref.)           | Ref.                          |          | Ref.              |          | Ref.                    |          | Ref.              |          | Ref.                 |          | Ref.              |          |
| moderate (4-6 points)            | 0.45 (0.29; 0.69)             | 0.0002   | 0.53 (0.33; 0.83) | 0.0062   | 0.33 (0.19; 0.57)       | <0.0001  | 0.35 (0.19; 0.66) | 0.0009   | 0.68 (0.31; 1.50)    | 0.3376   | 0.70 (0.29; 1.68) | 0.4139   |
| high (7-9 points)                | 0.41 (0.27; 0.64)             | <0.0001  | 0.52 (0.32; 0.82) | 0.0053   | 0.28 (0.13; 0.61)       | 0.0012   | 0.36 (0.16; 0.80) | 0.0109   | 0.88 (0.42; 1.84)    | 0.7298   | 1.15 (0.50; 2.62) | 0.7347   |

Ref.—reference category; 'Polish-aMED' score—'Polish-adapted Mediterranean Diet' score (range of points: 0–9); Moderate smoker—smoker who smoked 2.5 to 11 pack-years; Heavy smoker—smoker who smoked more than 11 pack-years; *p*—the level of significance was assessed by Wald's test; Adjusted model for: status smoking currently only cancer-control sample (never smokers, current smokers, former smokers), BMI (categories), socioeconomic status (low, average, high), overall physical activity (low, moderate, high), the occurrence of lung cancer in relatives (yes, no, I do not know), occupational exposure in the workplace (yes, no); reference category in the PCA: never smoker in controls.
